# Supplementary material for: Efficient metal-free sensitizers bearing circle chain embracing π-spacers for dye-sensitized solar cells
Source: Royal Society of Chemistry journal article supplement (doi:10.1039/c3ta12368e), 2013-01-01
Supplement: c3ta12368e.pdf [file c3ta12368e.pdf]

## Electronic Supplementary Information (ESI)

# Efficient Metal-free Sensitizers Bearing Circle Chain Embracing $\pi$ -Spacer for Dye-sensitized Solar Cells

Jian Liu, Xudong Yang, Ashraful Islam, Youhei Numata, Shufang Zhang, Noviana Tjitra Salim, and Liyuan Han\*

Photovoltaic Materials Unit, National Institute for Materials Science, Sengen 1-2-1, Tsukuba,

Ibaraki 305-0047, Japan, Fax: (+)81-29-859-2301, E-mail: HAN.Liyuan@nims.go.jp.

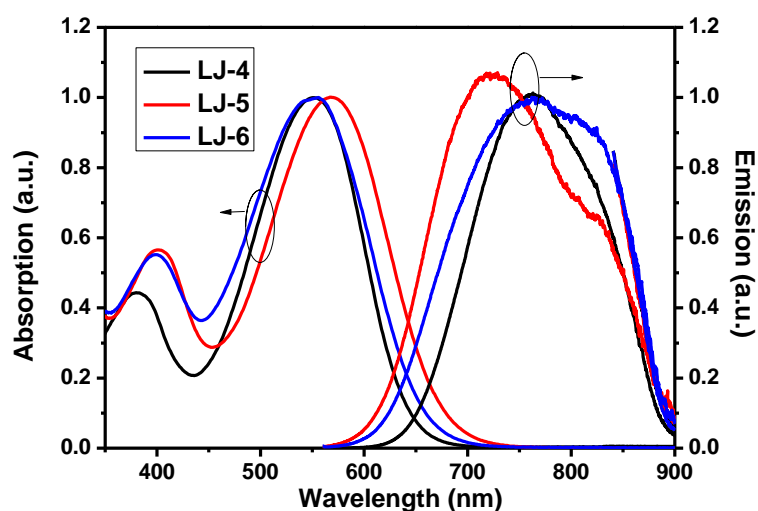

Fig. S1 Normalized UV-vis and emission spectra of dyes LJ-4, LJ-5 and LJ-6 in  $\text{CH}_2\text{Cl}_2$ .

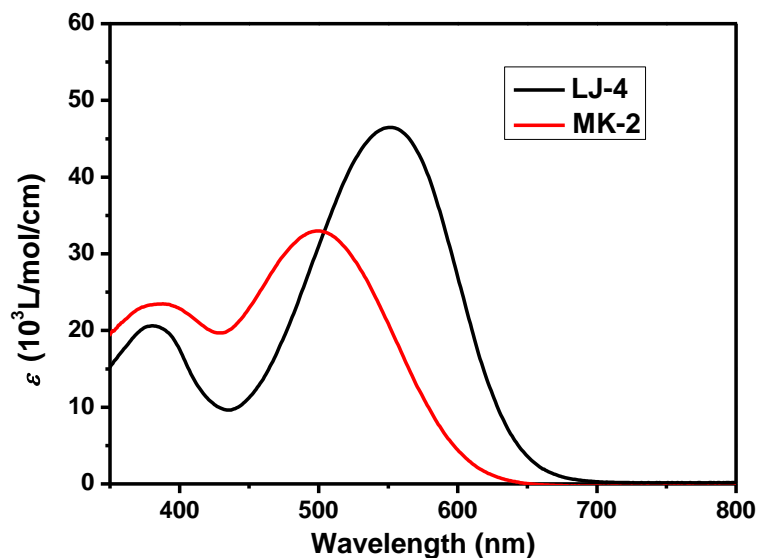

Fig. S2 UV-vis spectra of dyes LJ-4 and MK-2 in  $\text{CH}_2\text{Cl}_2$  ( $2 \times 10^{-5}$  M)

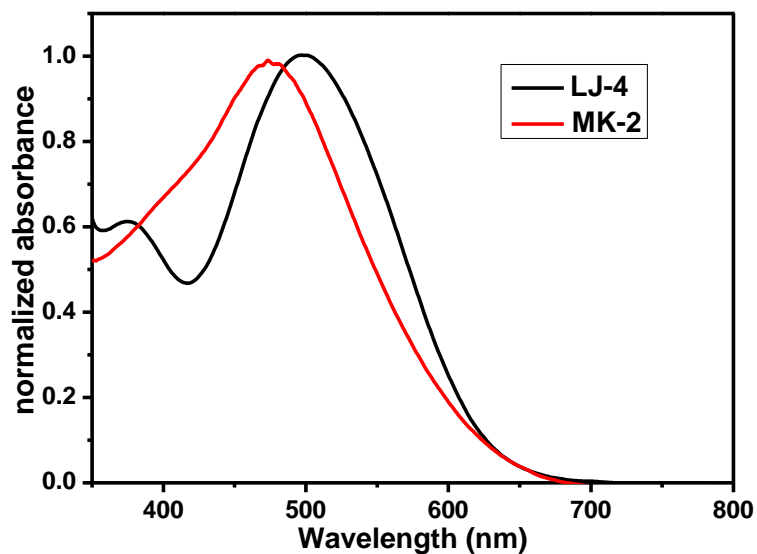

**Fig. S3** Normalized UV-vis spectra of dyes **LJ-4** and **MK-2** anchored on TiO<sub>2</sub> film.

### DFT Calculation

Geometry optimization and Molecular orbital distributions of three dyes were performed using B3LYP functional and 6-31G (d,p) basis set implemented in the Gaussian 09 program package.<sup>1</sup>

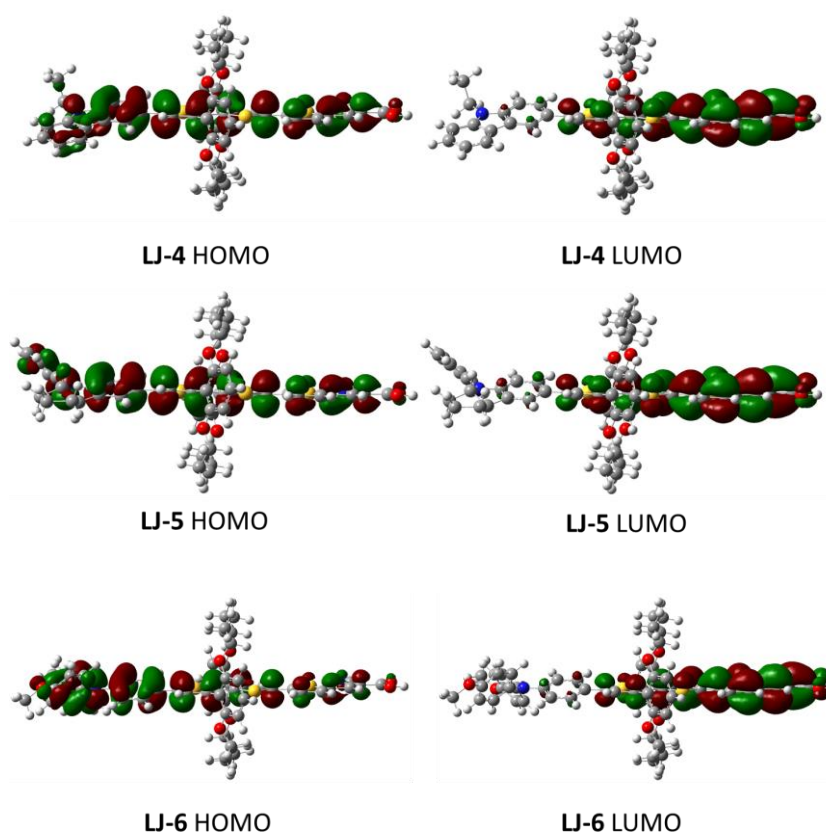

**Fig. S4** The HOMO and LUMO of dyes **LJ-4**, **LJ-5** and **LJ-6** optimized at B3LYP/6-31G\*\* level.

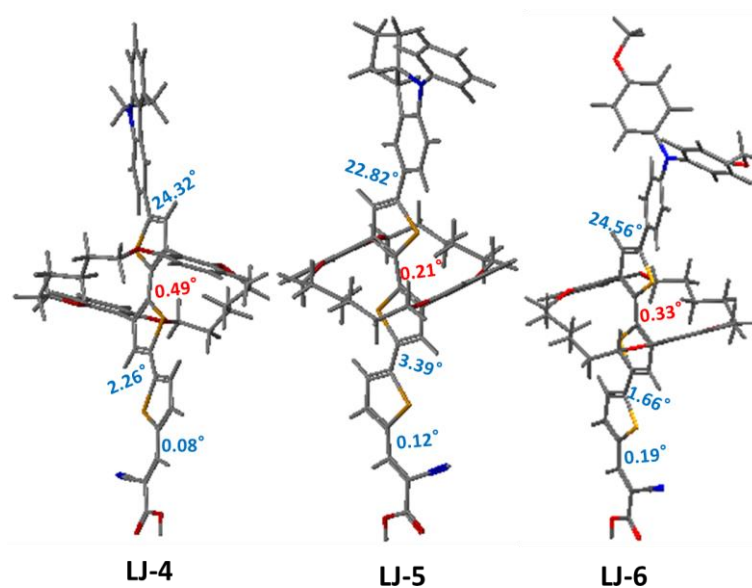

**Fig. S5** Optimized ground-state geometries and dihedral angles between the  $\pi$ -planes of **LJ-4**, **LJ-5** and **LJ-6**.

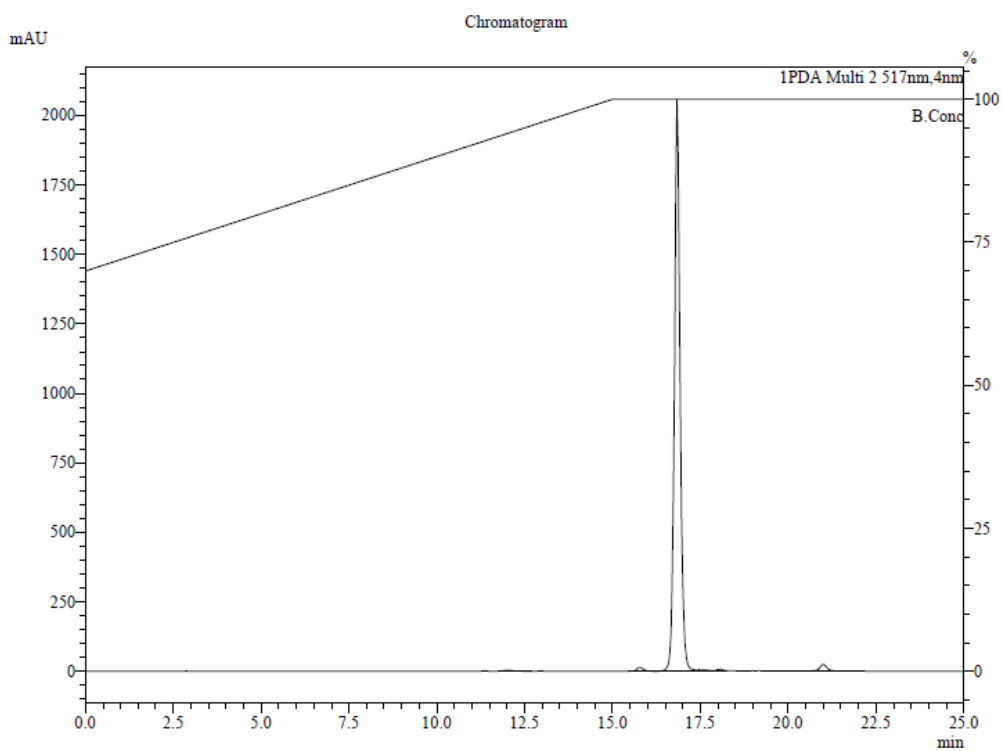

**Fig. S6** HPLC analysis of dye **LJ-4** (purity: 97.8%); mobile phase A: 1% formic acid in water; mobile phase B: acetonitrile, gradient program: B: 70% (0 min)→ B: 100% (15-30 min).

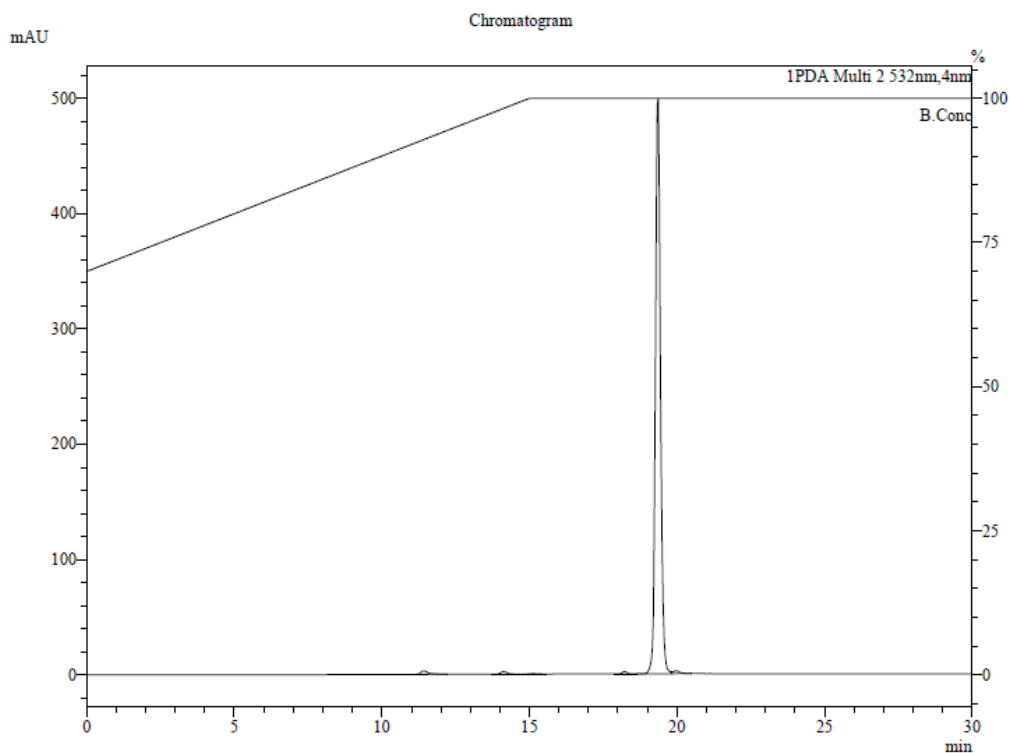

**Fig. S7** HPLC analysis of dye **LJ-5** (purity: 97.8%); mobile phase A: 1% formic acid in water; mobile phase B: acetonitrile, gradient program: B: 70% (0 min)→ B: 100% (15-30 min).

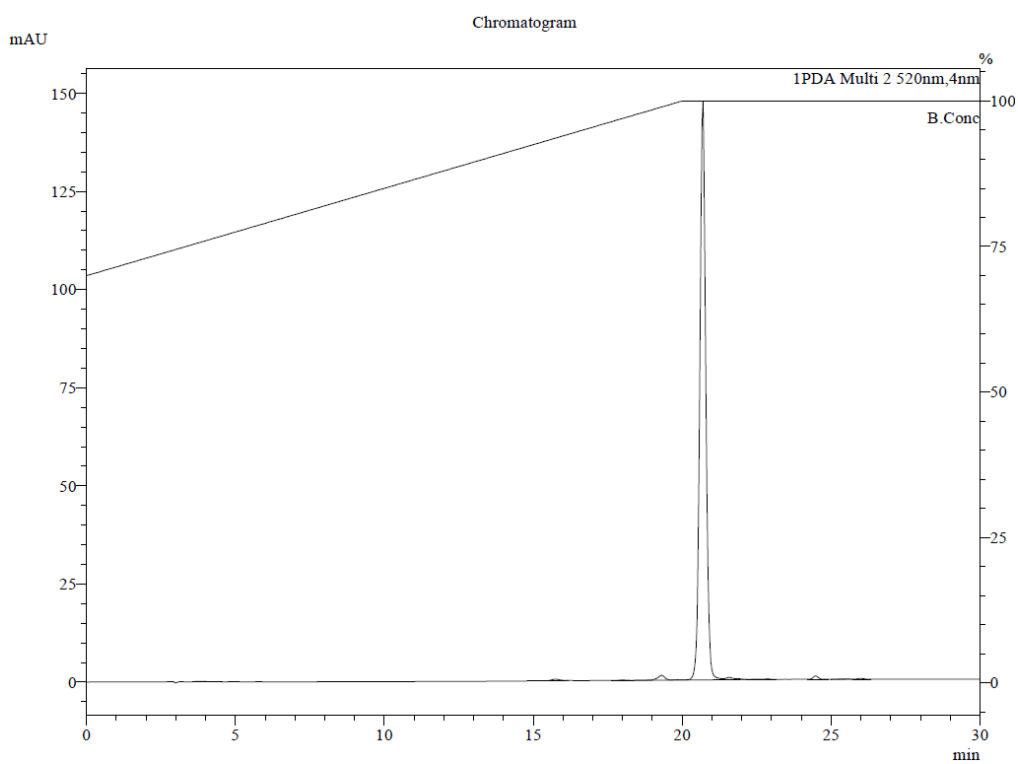

**Fig. S8** HPLC analysis of dye **LJ-6** (purity: 97.8%); mobile phase A: 1% formic acid in water; mobile phase B: acetonitrile, gradient program: B: 70% (0 min)→ B: 100% (15-30 min).

## Reference

1. M. J. Frisch, G. W. Trucks, H. B. Schlegel, G. E. Scuseria, M. A. Robb, J. R. Cheeseman, G. Scalmani, V. Barone, B. Mennucci, G. A. Petersson, H. Nakatsuji, M. Caricato, X. Li, H. P. Hratchian, A. F. Izmaylov, J. Bloino, G. Zheng, J. L. Sonnenberg, M. Hada, M. Ehara, K. Toyota, R. Fukuda, J. Hasegawa, M. Ishida, T. Nakajima, Y. Honda, O. Kitao, H. Nakai, T. Vreven, J. A. Montgomery Jr., J. E. Peralta, F. Ogliaro, M. Bearpark, J. J. Heyd, E. Brothers, K. N. Kudin, V. N. Staroverov, R. Kobayashi, J. Normand, K. Raghavachari, A. Rendell, J. C. Burant, S. S. Iyengar, J. Tomasi, M. Cossi, N. Rega, J. M. Millam, M. Klene, J. E. Knox, J. B. Cross, V. Bakken, C. Adamo, J. Jaramillo, R. Gomperts, R. E. Stratmann, O. Yazyev, A. J. Austin, R. Cammi, C. Pomelli, J. W. Ochterski, R. L. Martin, K. Morokuma, V. G. Zakrzewski, G. A. Voth, P. Salvador, J. J. Dannenberg, S. Dapprich, A. D. Daniels, O. Farkas, J. B. Foresman, J. V. Ortiz, J. Cioslowski and D. J. Fox, Gaussian 09, Revision A.02; Gaussian, Inc.: Wallingford, CT, **2009**.
